# Supplementary material for: Dynamic reversible bonds enable external stress-free two-way shape memory effect of a polymer network and the interrelated intrinsic self-healability of wider crack and recyclability
Source: Royal Society of Chemistry journal article supplement (doi:10.1039/c8ta05751f), 2018-01-01
Supplement: c8ta05751f1.pdf [file c8ta05751f1.pdf]

### Electronic Supplementary Information

**Title:** Dynamic reversible bonds enable external stress-free two-way shape memory effect of polymer network and the interrelated intrinsic self-healability of wider crack and recyclability

**Authors:** Long Fei Fan, Min Zhi Rong\*, Ming Qiu Zhang\* and Xu Dong Chen\*

*Evaluation of self-healing performance of the materials was conducted by two groups of experiments as follows.*

(i) For verification of the intrinsic self-healing ability, the dumbbell-shaped PU specimen (total length = 50 mm, length of reduced section = 20 mm, width = 4 mm, and thickness = 1 mm) was bisected, and then the broken parts were manually recombined to keep the faces of the two halves in alignment and intimate contact. Healing proceeded at 100 °C for different times. Afterwards, the healed specimen was measured by tensile tests at 25 °C according to ISO527-2 using a universal tester (CMT 6000, SANS, China) at a crosshead speed of 50 mm/min. The strength ratio of the healed specimen to the virgin specimen gives the measure of healing efficiency:

$$\text{Healing efficiency} = \frac{\sigma_{\text{healed}}}{\sigma_{\text{virgin}}} \quad (\text{S1})$$

where  $\sigma_{\text{virgin}}$  and  $\sigma_{\text{healed}}$  denote tensile strengths of virgin and healed specimen.

Because tensile strength of the virgin specimen cannot be fully restored, the reconnected interface became the weakest part, and had to break again during the subsequent tensile tests. This ensured that the second and third tensile failures happened to the same healed portion. That is, for quantifying efficiency of the second and third healing, the healed specimen was no longer cut like the virgin one, but subjected to repeated tensile tests and healing treatments. Healing efficiencies of multiple healing were thus calculated.

(ii) For examination of the self-healing assisted by shape memory effect, three virgin specimens were used. The first one was directly tested to failure under tension, offering the tensile strength,  $\sigma_{\text{virgin}}$ . The second one was half-cut to produce a wider crack (~250  $\mu\text{m}$  wide, ~0.5 mm deep, which is half the thickness of the specimen) in the middle and along the thickness direction of the dumbbell-shaped specimen, and tested to failure under tension, offering tensile strength,  $\sigma_{\text{half-cut}}$ . The third one was half-cut, healed with the help of shape memory effect, and finally tested to failure under tension, offering tensile strength,  $\sigma_{\text{healed}}$ . In this case, healing efficiency is defined as:

$$\text{Healing efficiency} = \frac{\sigma_{\text{healed}} - \sigma_{\text{half-cut}}}{\sigma_{\text{virgin}} - \sigma_{\text{half-cut}}} \quad (\text{S2})$$

To examine the reproducibility of the healability, a new specimen was half-cut, healed, reprogrammed, half-cut again on the healed place, healed for the second time, and eventually measured by tensile test. Furthermore, another new specimen was repeatedly half-cut and healed on the same place for three times and then subjected to tensile test. Accordingly, the multiple healability was characterized. To ensure the reproducibility of making wider crack on the same place of the specimen, a fixture that fixed the specimen and controlled the blade for cutting was employed.

**Tab. S1** One-way SMPs using reversible bonds as the reversible segments

| Polymers                                                                                                                                       | Reversible bonds                         | Ref. |
|------------------------------------------------------------------------------------------------------------------------------------------------|------------------------------------------|------|
| Poly( <i>n</i> -butyl acrylate)                                                                                                                | Hydrogen bond                            | S1   |
| Copolymer of butyl acrylate (BA), trimethylolpropane trimethacrylate (TMP-TMA) and ureidopyrimidinone-substituted ethyl methacrylate (UPy-EMA) | Hydrogen bond                            | S2   |
| Copolymer of 4-methacryloyloxy benzophenone, UPy-EMA and BA                                                                                    | Hydrogen bond                            | S3   |
| Thermoplastic polyurethane (PU) with quadruple hydrogen bonding                                                                                | Hydrogen bond                            | S4   |
| (Meth) acrylate copolymers                                                                                                                     | Hydrogen bond                            | S5   |
| PU                                                                                                                                             | Hydrogen bond                            | S6   |
| PU                                                                                                                                             | Hydrogen bond                            | S7   |
| PU                                                                                                                                             | Hydrogen bond                            | S8   |
| Poly(methacrylic acid- <i>co</i> -methy methacrylate)/poly(ethylene glycol) complexes                                                          | Hydrogen bond                            | S9   |
| Poly(acrylic acid- <i>co</i> -methacrylate)/poly(ethylene glycol) complexes                                                                    | Hydrogen bond                            | S10  |
| Poly(methyl methacrylate)- <i>co</i> -( <i>N</i> -vinyl-2-pyrrolidone)/poly(ethylene glycol) semi-interpenetrating polymer                     | Hydrogen bond                            | S11  |
| poly(methyl acrylate)- <i>co</i> -(acrylic acid)                                                                                               | Hydrogen bond                            | S12  |
| poly(ethylene glycol)-UPy copolymer                                                                                                            | Hydrogen bond                            | S13  |
| Polyacrylamide-based hydrogel                                                                                                                  | Hydrogen bond                            | S14  |
| Poly lactide/hydroxyapatite nanocomposites                                                                                                     | Hydrogen bond                            | S15  |
| Cellulose-whiskers/PU nanocomposites                                                                                                           | Hydrogen bond                            | S16  |
| Graphene-poly(acrylamide- <i>co</i> -acrylic acid) hybrid materials                                                                            | Hydrogen bond                            | S17  |
| Polyvinyl alcohol/graphene oxide nanocomposites                                                                                                | Hydrogen bond                            | S18  |
| PU/cotton cellulose nanowhiskers nanocomposites                                                                                                | Hydrogen bond                            | S19  |
| Polyolefin elastomer/modified graphene nanocomposites                                                                                          | Hydrogen bond                            | S20  |
| Poly(glycerol sebacate)                                                                                                                        | Hydrogen bond                            | S21  |
| Polyvinylpyrrolidone/<br>poly(hydroxyethyl methacrylate- <i>co</i> -butyl acrylate) semi-IPNs                                                  | Hydrogen bond                            | S22  |
| Epoxidized natural rubber                                                                                                                      | Hydrogen bond                            | S23  |
| PU ionomer                                                                                                                                     | Ionic interactions                       | S24  |
| Poly(ether ether ketone) (PEEK)                                                                                                                | Ionic interactions                       | S25  |
| Sulfonated PEEK ionomers                                                                                                                       | Ionic interactions                       | S26  |
| Mixtures of elastomeric ionomer and fatty acids or their salts                                                                                 | Ionic interactions                       | S27  |
| Copolymer of acrylamide and acrylic acid with low amounts of a cationic surfmer                                                                | Ionic interactions                       | S28  |
| Cellulose-butyl-3-methylimidazolium chloride gel                                                                                               | Ionic interactions                       | S29  |
| Supramolecular hydrogels composed of phenylboronic acid modified sodium alginate and poly(vinyl alcohol)                                       | Ionic interactions                       | S30  |
| Polybutadiene                                                                                                                                  | Ionic interactions                       | S31  |
| Copolymer of <i>n</i> -Octadecyl acrylate, acrylamide and acrylic acid                                                                         | Ionic interactions                       | S32  |
| Poly(acrylic acid)-graphene oxide-Fe <sup>3+</sup> hydrogel                                                                                    | Ionic interactions                       | S33  |
| Polybutadiene                                                                                                                                  | Metal-ligand coordination                | S34  |
| Poly( <i>p</i> -dioxanone) metallosupramolecular network                                                                                       | Metal-ligand coordination                | S35  |
| Copolymer of stearyl methacrylate, acrylamide, and acrylic acid                                                                                | Metal-ligand coordination                | S36  |
| Polyimides                                                                                                                                     | $\pi$ - $\pi$ stacking                   | S37  |
| Pentaerythritol tetra(3-mercaptopropionate)2-methylene-propane-1,3-di(thioethyl vinyl ether)                                                   | Allyl sulfide                            | S38  |
| Epoxy networks                                                                                                                                 | Hydroxy-ester                            | S39  |
| Sodium alginate                                                                                                                                | Phenylboronic acid-catechol interactions | S40  |
| Copolymer of <i>N,N</i> -dimethylacrylamide, 2-hydroxyethyl acrylate and boric acid                                                            | Boronate ester                           | S41  |
| Copolymer of <i>n</i> -butylacrylate, hydroxyethyl methacrylate and ethyleneglycol-1-acrylate-2-cinnamic acid                                  | Cinnamic groups                          | S42  |
| PU                                                                                                                                             | Diels-Alder bond                         | S43  |
| Polyesterurethane                                                                                                                              | Diels-Alder bond                         | S44  |
| Poly(styrene- <i>block</i> -butadiene- <i>block</i> -styrene)                                                                                  | Diels-Alder bond                         | S45  |
| Epoxy                                                                                                                                          | Diels-Alder bond                         | S46  |

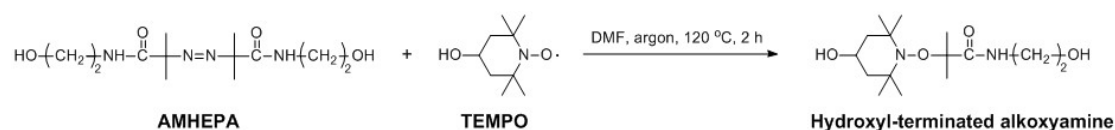

**Fig. S1** Synthesis of hydroxyl-terminated alkoxyamine.

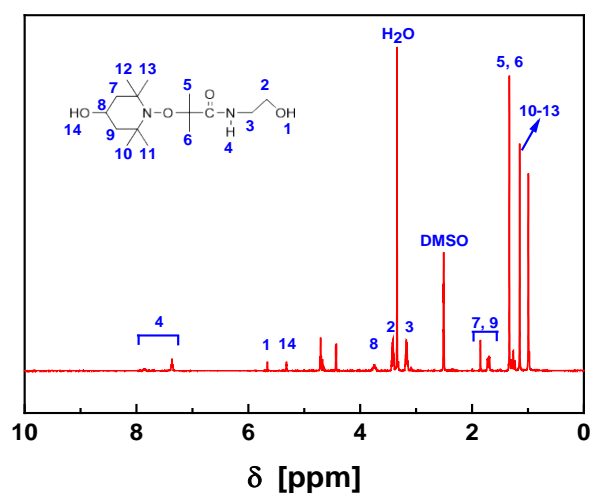

**Fig. S2**  $^1\text{H}$  NMR spectrum of hydroxyl-terminated alkoxyamine.

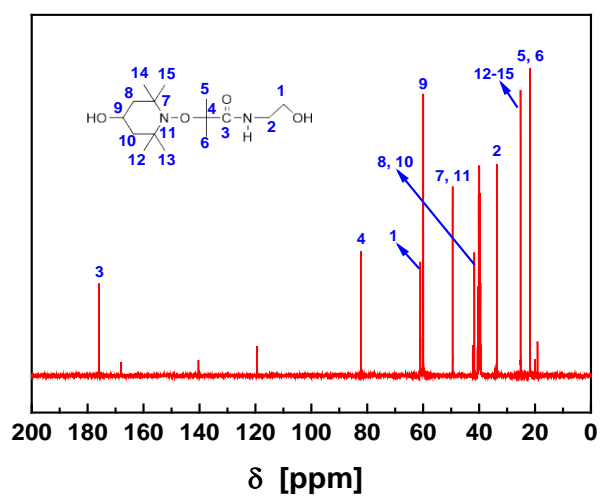

**Fig. S3**  $^{13}\text{C}$  NMR spectrum of hydroxyl-terminated alkoxyamine.

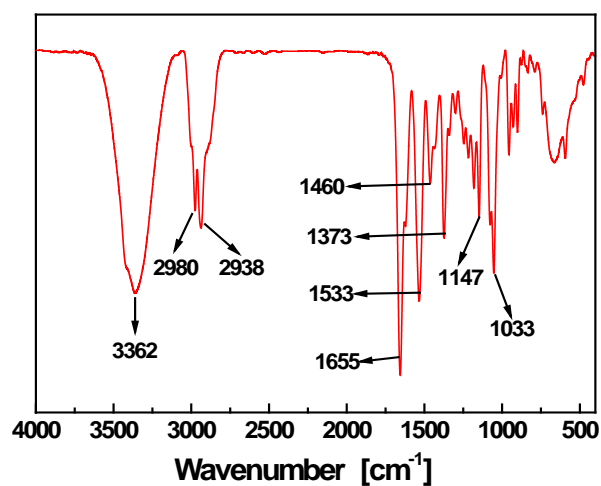

**Fig. S4** FTIR spectrum of hydroxyl-terminated alkoxyamine.

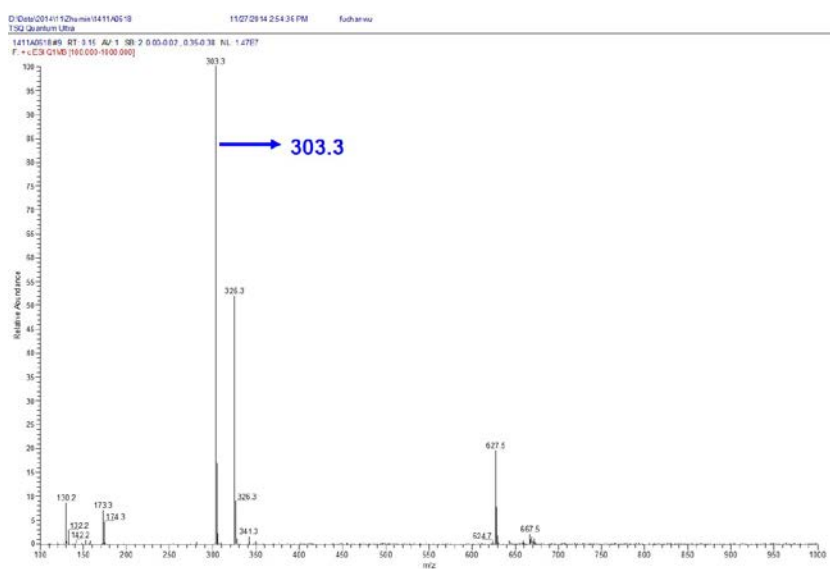

**Fig. S5** Mass spectrum of hydroxyl-terminated alkoxyamine.

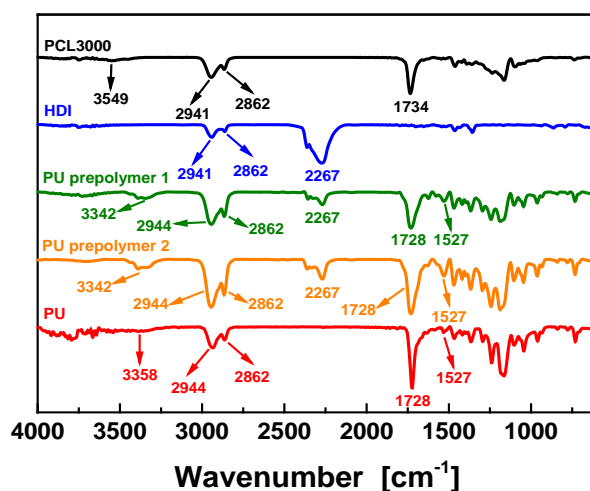

**Fig. S6** FTIR spectra of HDI, PCL, PU prepolymer 1, PU prepolymer 2 and PU. FTIR (KBr/cm<sup>-1</sup>): PCL (3549, 2941, 2862, 1734, and 1462), HDI (2941, 2862, 2267, and 1464), PU prepolymer 1 (3342, 2944, 2862, 2267, 1728, 1527, and 1467), PU prepolymer 2 (3342, 2944, 2862, 2267, 1728, 1527, and 1467), and PU (3348, 2944, 2862, 1728, 1527, and 1466).

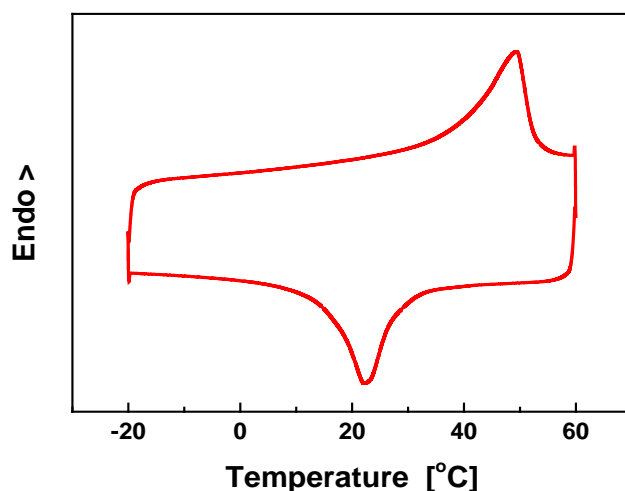

**Fig. S7** DSC heating and cooling scans of the crosslinked PU (ramp: 3 °C/min). The crystallinity ( $X_c$ ) calculated from  $\Delta H_f / \Delta H_f^\circ$  (where  $\Delta H_f$  denotes the measured heat of fusion, and  $\Delta H_f^\circ$  is the heat of fusion of 100% crystalline PCL (139.5 J g<sup>-1</sup> S47)) is found to be 24.3%.

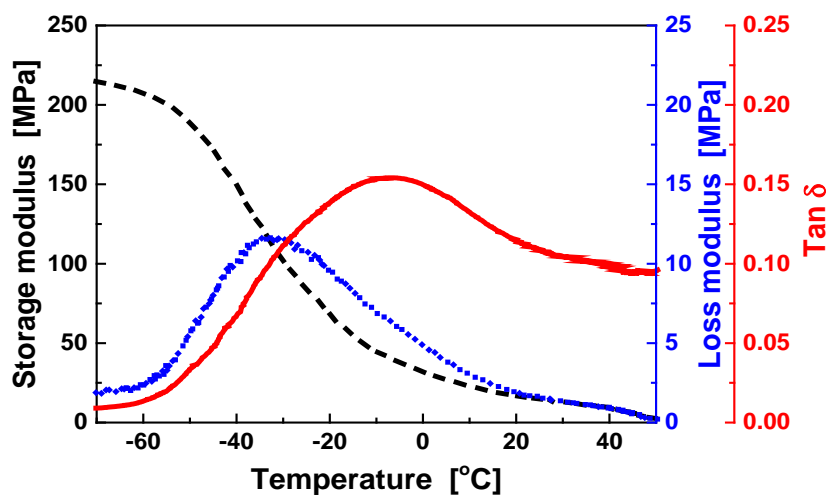

**Fig. S8** DMA spectra of the crosslinked PU (ramp: 3 °C/min; frequency: 1 Hz).

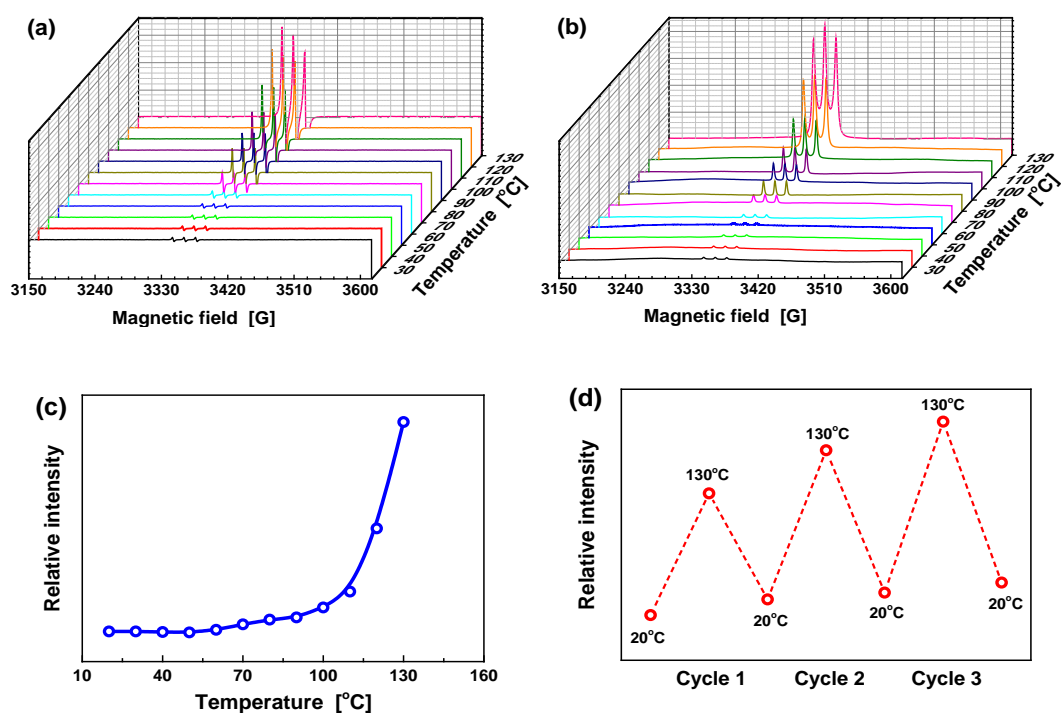

**Fig. S9** (a) Typical ESR spectra of hydroxyl-terminated alkoxyamine measured at various temperatures. (b) Normalized absorption lines converted from the data of (a). (c) Temperature dependence of relative ESR signal intensities calculated from integral areas of the normalized absorption curves in (b). (d) Relative ESR signal intensities measured during heating-cooling cycles between 20 and 130 °C.

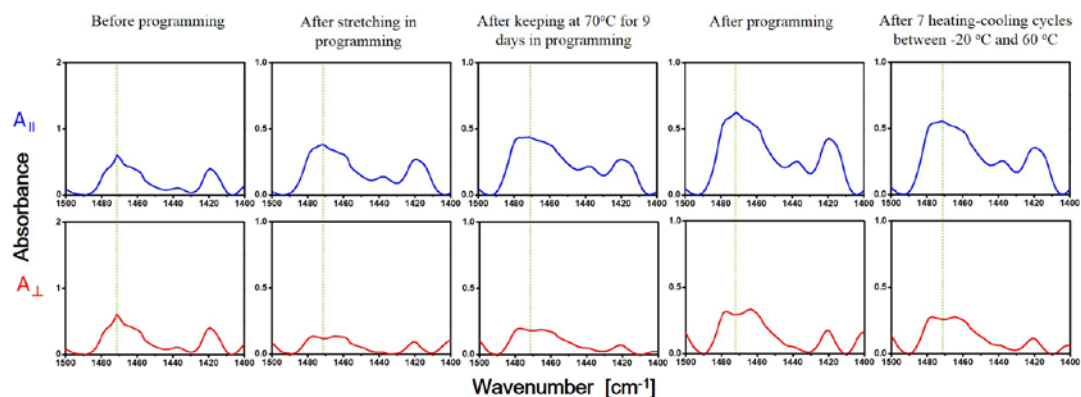

**Fig. S10**  $\delta(-\text{CH}_2-)$  region on the FTIR spectra of the crosslinked PU specimens. Note: The specimen measured after stretching in programming means that it was deformed to a temporary shape with strain of 1000 % (refer to step ② in **Fig. 6**) and cooled down to room temperature for the FTIR measurement. The specimen measured after keeping at 70 °C for 9 days in programming refers to that obtained after step ⑤ in **Fig. 6**.

**Tab. S2** Characterization of orientation of the crosslinked PU specimen based on the measurement of FTIR dichroism in **Fig. S10**

| Sample          | Before programming | After stretching in programming | After keeping at 70°C for 9 days in programming | After programming | After 7 heating-cooling cycles between RT and 60°C |
|-----------------|--------------------|---------------------------------|-------------------------------------------------|-------------------|----------------------------------------------------|
| $A_{\parallel}$ | 0.6                | 0.38                            | 0.44                                            | 0.63              | 0.56                                               |
| $A_{\perp}$     | 0.6                | 0.12                            | 0.18                                            | 0.29              | 0.26                                               |
| R               | 1                  | 3.17                            | 2.44                                            | 2.17              | 2.15                                               |
| $(R-1)/(R+2)$   | 0                  | 0.42                            | 0.32                                            | 0.28              | 0.28                                               |

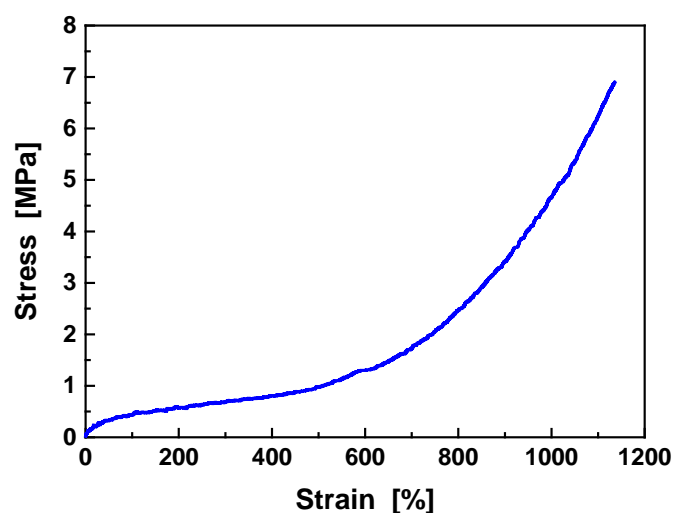

**Fig. S11** Typical tensile stress-strain curve of the crosslinked PU measured at 60 °C. Prior to the test, the specimen was firstly immersed in the THF solution of LiBr (500 mL, 20 g/L) for 24 h at room temperature to remove the inter- and intra-macromolecular hydrogen bonds<sup>S48-S50</sup>. Then, the specimen was dried at room temperature for 24 h allowing for evaporation of THF. Finally, the specimen was heated to 60 °C for 2 min and tested to failure under tension.

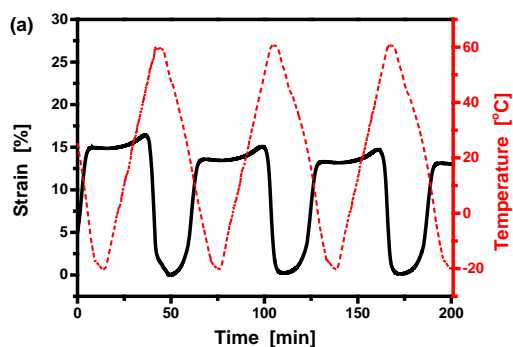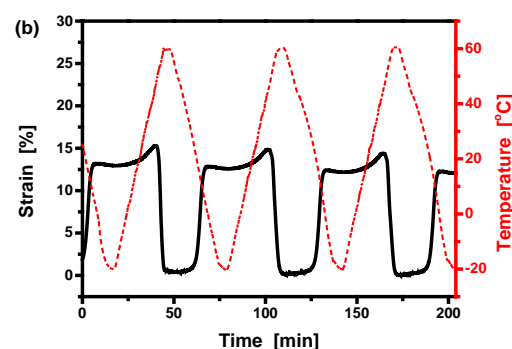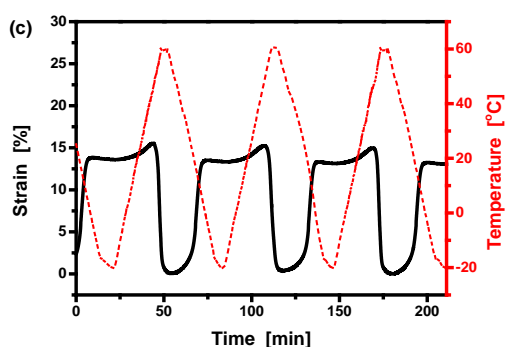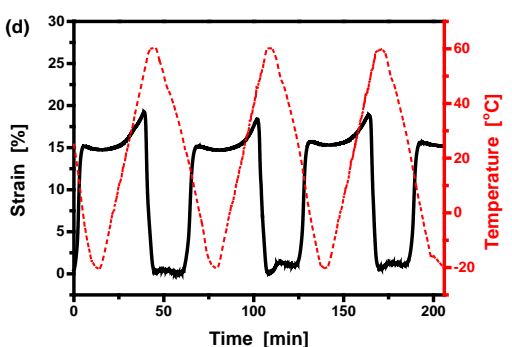



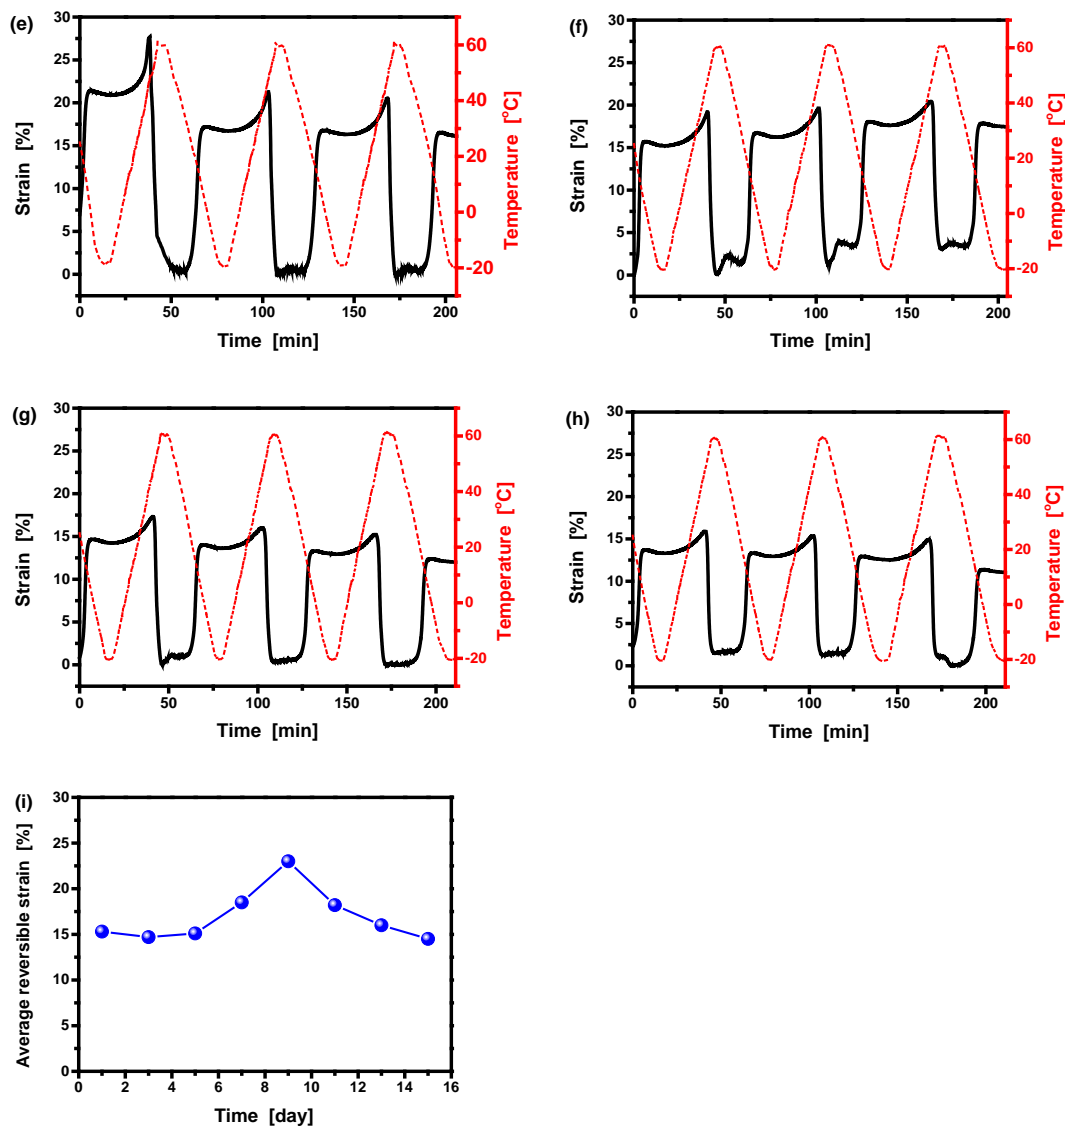

**Fig. S12** (a)-(h) Reversible strain measured by DMA of the programmed PU during repeated heating and cooling cycles between -20 and 60 °C (ramp: 3 °C/min). Training times: (a) 1 day, (b) 3 days, (c) 5 days, (d) 7 days, (e) 9 days, (f) 11 days, (g) 13 days, and (h) 15 days. (i) Average reversible strains of the specimens versus training time.

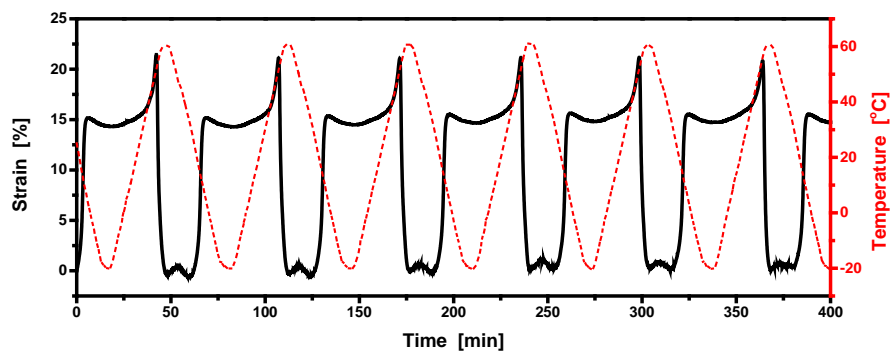

**Fig. S13** Thermomechanical behavior (measured by DMA) of the reprogrammed crosslinked PU during repeated heating and cooling cycles between -20 and 60 °C (ramp: 3 °C/min).

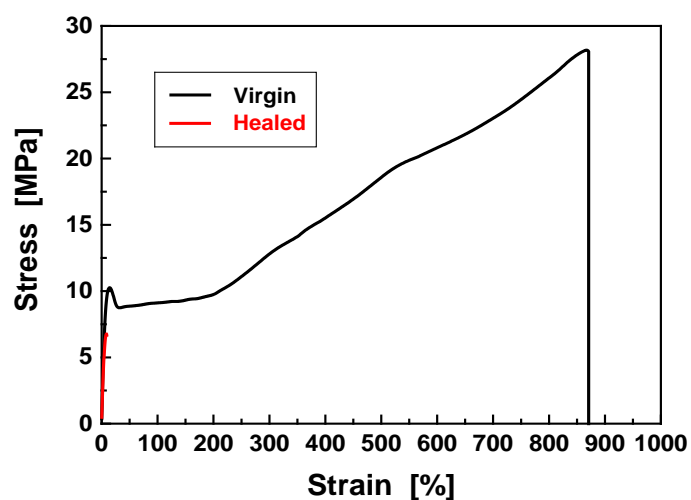

**Fig. S14** Typical tensile stress-strain curves of virgin and healed control specimens. The control sample was synthesized following the same procedures applied to the production of the crosslinked PU, while hydroxyl-terminated alkoxyamine was replaced by 1,4-butanediol (BDO). Then, the dumbbell-shaped specimen of the control was bisected, manually recombined, healed at 100 °C for 24 h, and measured by tensile test.

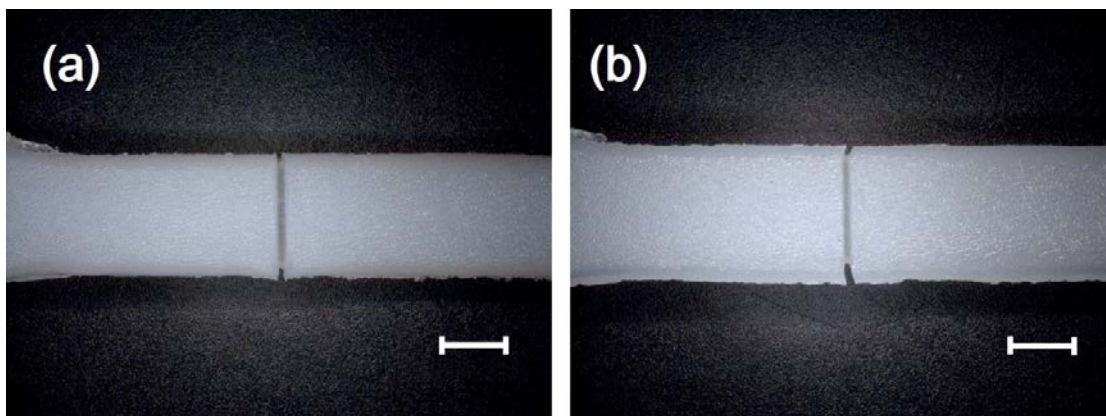

**Fig. S15** Photos showing the half-cut crack on the unprogrammed crosslinked PU specimen (a) before and (b) after healing at 100 °C for 24 h. The scale bar represents 2 mm in length.

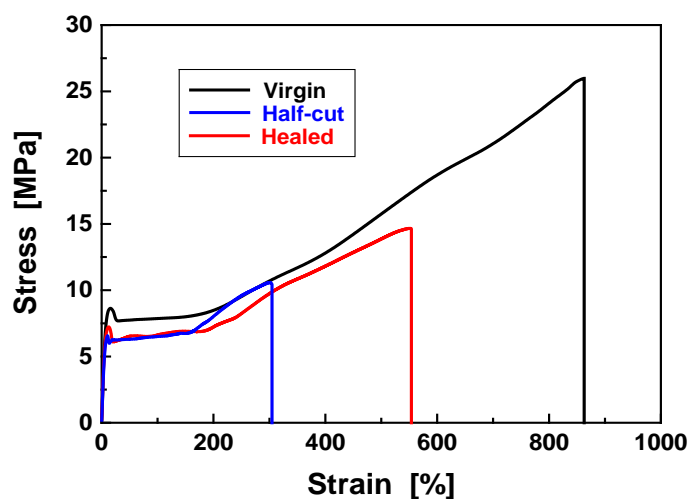

**Fig. S16** Typical tensile stress-strain curves of virgin, half-cut and healed unprogrammed crosslinked PU specimens. Healing conditions: 100 °C, 24 h.

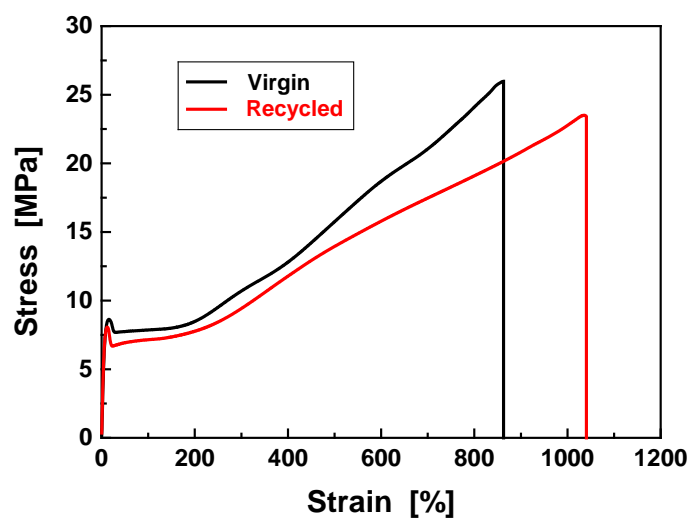

**Fig. S17** Typical tensile stress-strain curves of the crosslinked PU and its recycled version.

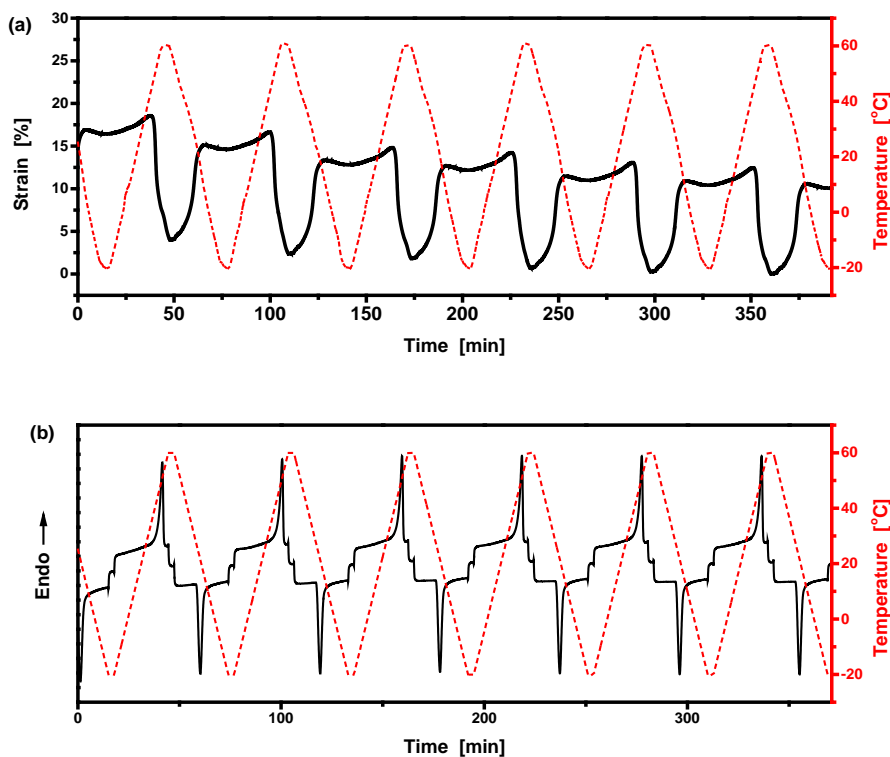

**Fig. S18** (a) Thermomechanical behavior (measured by DMA) and (b) thermogram (measured by DSC) of the programmed recycled PU during repeated heating and cooling cycles between -20 and 60 °C (ramp: 3 °C/min). The first cycle that was used to remove the thermal history is not displayed for clarity.

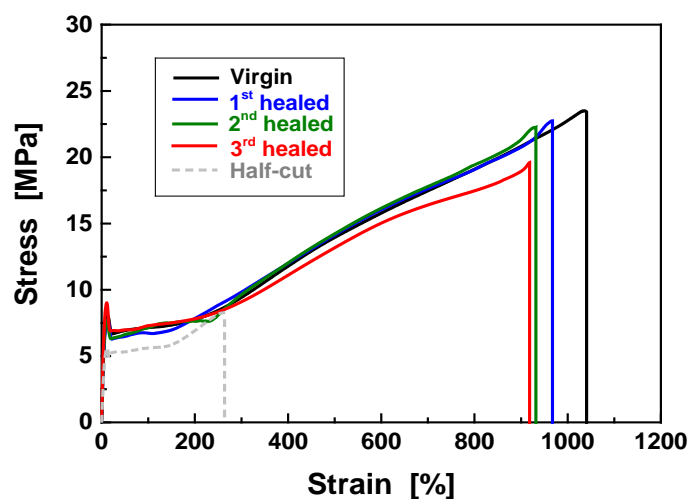

**Fig. S19** Typical tensile stress-strain curves of repeatedly healed recycled PU with the assistance of shape memory effect (crack size: ~250  $\mu\text{m}$  wide and ~0.5 mm deep).

## Supporting references

- [S1] C. L. Lewis, K. Stewart and M. Anthamatten, *Macromolecules*, 2014, **47**, 729-740.
- [S2] J. Li, J. A. Viveros, M. H. Wrue and M. Anthamatten, *Adv. Mater.*, 2007, **19**, 2851-2855.
- [S3] J. Li, C. L. Lewis, D. L. Chen and M. Anthamatten, *Macromolecules*, 2011, **44**, 5336-5343.
- [S4] Y. Zhu, J. Hu and Y. Liu, *Eur. Phys. J. E*, 2009, **28**, 3-10.
- [S5] T. Ware, K. Hearon, A. Lonneckner, K. L. Wooley, D. J. Maitland and W. Voit, *Macromolecules*, 2012, **45**, 1062-1069.
- [S6] S. Chen, J. Hu, C. Yuen and L. Chan, *Polymer*, 2009, **50**, 4424-4428.
- [S7] S. Chen, J. Hu, H. Zhou, C. Yuen and L. Chan, *Polymer*, 2010, **51**, 240-248.
- [S8] S. Chen, J. Hu, H. Zhuo and S. Chen, *J. Mater. Sci.*, 2011, **46**, 5294-5304.
- [S9] Y. Cao, Y. Guan, J. Du, Y. Peng, C. W. Yip and A. S. C. Chan, *Chinese J. Polym. Sci.*, 2003, **21**, 29-3.
- [S10] G. Liu, X. Ding, Y. Cao, Z. Zheng and Y. Peng, *Macromolecules*, 2004, **37**, 2228-2232.
- [S11] G. Liu, C. Guan, H. Xia, F. Guo, X. Ding and Y. Peng, *Macromol. Rapid Commun.*, 2006, **27**, 1100-1104.
- [S12] Y. Pan, T. Liu, J. Li, Z. Zheng, X. Ding and Y. Peng, *J. Polym. Sci. Part B: Polym. Phys.*, 2011, **49**, 1241-1245.
- [S13] M. Guo, L. M. Pitet, H. M. Wyss, M. Vos, P. Y. W. Dankers, E. W. Meijer, *J. Am. Chem. Soc.*, 2014, **136**, 6969-6977.
- [S14] T. Zhao, M. Tan, Y. Cui, C. Deng, H. Huang and M. Guo, *Polym. Chem.*, 2014, **5**, 4965-4973.
- [S15] S. Zhou, X. Zheng, X. Yu, J. Wang, J. Weng, X. Li, B. Feng and M. Yin, *Chem. Mater.*, 2007, **19**, 247-253.
- [S16] H. Luo, J. Hu and Y. Zhu, *Macromol. Chem. Phys.*, 2011, **212**, 1981-1986.
- [S17] J. Dong, J. Ding, J. Weng and L. Dai, *Macromol. Rapid Commun.*, 2013, **34**, 659-664.
- [S18] X. Qi, X. Yao, S. Deng, T. Zhou and Q. Fu, *J. Mater. Chem. A*, 2014, **2**, 2240-2249.
- [S19] J. Mendez, P. K. Annamalai, S. J. Eichhorn, R. Rusli, S. J. Rowan, E. J. Foster and C. Weder, *Macromolecules*, 2011, **44**, 6827-6835.
- [S20] M. Kashif and Y.-W Chang, *Eur. Polym. J.*, 2015, **66**, 273-281.
- [S21] Y. Wu, L. Wang, X. Zhao, S. Hou, B. Guo and P. X. Ma, *Biomaterials*, 2016, **104**, 18-31.
- [S22] Z.-C. Jiang, Y.-Y. Xiao, Y. Kang, B.-J. Li and S. Zhang, *Macromol. Rapid Commun.*, 2017, **38**, 1700149.

- [S23] T. Lin, Z. Tang and B. Guo, *ACS Appl. Mater. Interfaces*, 2014, **6**, 21060-21068.
- [S24] Y. Zhu, J. Hu, J. Lu, L. Y. Yeung and K. Yeung, *Polym. Adv. Technol.*, 2008, **19**, 1745-1753.
- [S25] Y. Shi, M. Yoonessi and R. A. Weiss, *Macromolecules*, 2013, **46**, 4160-4167.
- [S26] Y. Shi and R. A. Weiss, *Macromolecules*, 2014, **47**, 1732-1740.
- [S27] R. A. Weiss, E. Izzo and S. Mandelbaum, *Macromolecules*, 2008, **41**, 2978-2980.
- [S28] Y. Fan, W. Zhou, A. Yasin, H. Li and H. Yang, *Soft Matter*, 2015, **11**, 4218-4225.
- [S29] H. Izawa, Y. Kaneko and J. Kadokawa, *J. Mater. Chem.*, 2009, **19**, 6969-6972.
- [S30] H. Meng, P. Xiao, J. Gu, X. Wen, J. Xu, C. Zhao, J. Zhang and T. Chen, *Chem. Commun.*, 2014, **50**, 12277-12280.
- [S31] D. Wang, J. Guo, H. Zhang, B. Cheng, H. Shen, N. Zhao and J. Xu, *J. Mater. Chem. A*, 2015, **3**, 12864-12872.
- [S32] K. Peng, H. Yu, H. Yang, X. Hao, A. Yasin and X. Zhang, *Soft Matter*, 2017, **13**, 2135-2140.
- [S33] L. Zhao, J. Huang, T. Wang, W. Sun and Z. Tong, *Macromol. Mater. Eng.*, 2017, **302**, 1600359.
- [S34] J. R. Kumpfer and S. J. Rowan, *J. Am. Chem. Soc.*, 2011, **133**, 12866-12874.
- [S35] T. Zhang, Z. Wen, Y. Hui, M. Yang, K. Yang, Q. Zhou and Y. Wang, *Polym. Chem.*, 2015, **6**, 4177-4184.
- [S36] Z. Qin, R. Niu, C. Tang, J. Xia, F. Ji, D. Dong, H. Zhang, S. Zhang, J. Li and F. Yao, *Macromol. Mater. Eng.*, 2018, **303**, 1700396.
- [S37] Q. Wang, Y. Bai, Y. Chen, J. Ju, F. Zheng and T. Wang, *J. Mater. Chem. A*, 2015, **3**, 352-359.
- [S38] T. F. Scott, R. B. Draughon and C. N. Bowman, *Adv. Mater.*, 2006, **18**, 2128-2132.
- [S39] D. Montarnal, M. Capelot, F. Tournilhac and L. Leibler, *Science*, 2011, **334**, 965-968.
- [S40] Z. Li, W. Lu, T. Ngai, X. Le, J. Zheng, N. Zhao, Y. Huang, X. Wen, J. Zhang and T. Chen, *Polym. Chem.*, 2016, **7**, 5343-5346.
- [S41] Y. Chen, W. Qian, R. Chen, H. Zhang, X. Li, D. Shi, W. Dong, M. Chen and Y. Zhao, *ACS Macro. Lett.*, 2017, **6**, 1129-1133.
- [S42] A. Lendlein, H. Jiang, O. Jünger and R. Langer, *Nature*, 2005, **434**, 879-882.
- [S43] X. Lu, G. Fei, H. Xia and Y. Zhao, *J. Mater. Chem. A*, 2014, **2**, 16051-16060.
- [S44] J.-M. Raquez, S. Vanderstappen, F. Meyer, P. Verge, M. Alexandre, J.-M. Thomassin, C. Jerome and P. Dubois, *Chem. Eur. J.*, 2011, **17**, 10135-10143.
- [S45] J. Bai and Z. Shi, *ACS Appl. Mater. Interfaces*, 2017, **9**, 27213-27222.

- [S46] G. Zhang, Q. Zhao, L. Yang, W. Zou, X. Xi and T. Xie, *ACS Macro. Lett.*, 2016, **5**, 805-808.
- [S47] V. Crescenzi, G. Manzini, G. Calzolari and C. Borri, *Eur. Polym. J.*, 1972, **8**, 449-463.
- [S48] P. Alexander, *Ann. N. Y. Acad. Sci.*, 1951, **53**, 653-673.
- [S49] K. I. Furuhata, K. Koganei, H. S. Chang, N. Aoki and M. Sakamoto, *Carbohydr. Res.*, 1992, **230**, 165-177.
- [S50] H. Tseng, K. I. Furuhata and M. Sakamoto, *Carbohydr. Res.*, 1995, **270**, 149-161.
